# Supplementary material for: Toxicological Effects of Naturally Occurring Endocrine Disruptors on Various Human Health Targets: A Rapid Review
Source: MDPI journal article supplement (doi:10.3390/toxics12040256), 2024-03-29
Supplement: s1 [file s1]

**Search:** (((("ENDOCRINE DISRUPTORS"[PHARMACOLOGICAL ACTION]) OR ("ENDOCRINE DISRUPTORS"[MESH]) OR ("ENDOCRINE DISRUPTOR"[tiab:~5] OR "ENDOCRINE DISRUPTORS"[tiab:~5] OR "ENDOCRINE DISRUPTION"[tiab:~5] OR "ENDOCRINE DISRUPTING"[tiab:~5] OR "ENDOCRINE DISRUPTER"[tiab:~5] OR "ENDOCRINE DISRUPTERS"[tiab:~5] OR "ENDOCRINE DISRUPT\*")) AND (("8-PRENYLNARINGENIN" [SUPPLEMENTARY CONCEPT] OR BISPHENOL F [SUPPLEMENTARY CONCEPT] OR ANDROGENS [PHARMACOLOGICAL ACTION] OR "PHYTOESTROGENS" [PHARMACOLOGICAL ACTION] OR "COUMESTAN" [SUPPLEMENTARY CONCEPT] OR "DAIDZEIN" [SUPPLEMENTARY CONCEPT] OR "GALLOCATECHOL" [SUPPLEMENTARY CONCEPT] OR "PEONIFLORIN" [SUPPLEMENTARY CONCEPT] OR "PREGNA-4,17-DIENE-3,16-DIONE" [SUPPLEMENTARY CONCEPT] OR "ALTERNARIOL" [SUPPLEMENTARY CONCEPT]) OR ("COUMARINS"[MESH] OR "MYCOTOXINS"[MESH] OR "ANTHRAQUINONES"[MESH] OR "CURCUMIN" [MESH] OR "GOSSYPOL"[MESH] OR "PHYTOESTROGENS"[MESH TERMS] OR "FLAVONOIDS"[MESH TERMS] OR "LIGNANS"[MESH TERMS] OR "STILBENES"[MESH TERMS] OR "PHYTOSTEROLS"[MESH TERMS] OR "OILS, VOLATILE"[MESH TERMS] OR "EMODIN"[MESH TERMS] OR "MELALEUCA"[MESH TERMS] OR "SOYBEANS"[MESH TERMS] OR "SOY FOODS"[MESH TERMS] OR "ZEARALENONE"[MESH TERMS]) OR ("8-prenylnaringenin\*" [tiab] OR "BISPHENOL F" [tiab] OR ANDROGENS [tiab] OR COUMESTROL\* [tiab] OR COUMARINS\* [tiab] OR ISOCOUMARINS\* [tiab] OR OCHRATOXIN\* [tiab] OR MYCOTOXIN\* [tiab] OR FLAVON\* [tiab] OR APIGENIN [TIAB] OR KAEMPFEROLS\* [TIAB] OR ANTHRAQUINONE\* [TIAB] OR ZERANOL\* [TIAB] OR CURCUMIN [TIAB] OR GOSSYPOL [TIAB] OR PHYTOESTROGEN\* [tiab] OR ISOFLAVONE\* [ tiab] OR GENISTEIN [tiab] OR LUTEOLIN [tiab] OR QUERCETIN [tiab] OR "ESSENTIAL OIL" [tiab] OR "ESSENTIAL OILS" [tiab] OR "TEA TREE OIL" [tiab] OR DAIDZEIN [tiab] OR EPIGALLOCATECHIN\* [tiab] OR PAEONIFLORIN [tiab] OR PEONIFLORIN [tiab] OR GUGGULSTERONE [tiab] OR EMODIN [tiab] OR MELALEUCA [tiab] OR SOYBEAN\* [tiab] OR SOY [tiab] OR ZEARALENONE [tiab] OR ALTERNARIOL [tiab] OR RESVERATROL [tiab] OR COUMESTAN\* [tiab]))) AND ((humans[Filter]) AND (english[Filter]) AND (2019:2023[pdat]))) Filters: Humans, English, from 2019 - 2023

**Sent On:** Mon Sep 25 10:17:06 2023

**Figure S1.** Complete "Full string" used for research strategy, in order to interrogate the PubMed database and to found the eligible papers.
